# Supplementary material for: Diversity of crystal structure with different lanthanide ions involving in situ oxidation–hydrolysis reaction
Source: Royal Society of Chemistry journal article supplement (doi:10.1039/b708165k), 2007-01-01
Supplement: b708165k.pdf [file b708165k.pdf]

## Supporting Information

### Diversity of Crystal Structure with Different Lanthanide Ions Involving In Situ Oxidation–Hydrolysis Reaction

Jian-Wen Cheng,<sup>a</sup> Shou-Tian Zheng,<sup>a</sup> and Guo-Yu Yang<sup>\*,a,b</sup>

<sup>a</sup> State Key Laboratory of Structural Chemistry, Fujian Institute of Research on the Structure of Matter, and Graduate School of the Chinese Academy of Sciences, Fuzhou, Fujian, 350002, China. E-mail: ygy@fjirsm.ac.cn, Fax: (+86) 591-83710051; <sup>b</sup> State Key Lab of Rare Materials Chemistry and Applications, Peking University, Beijing, 100871, China

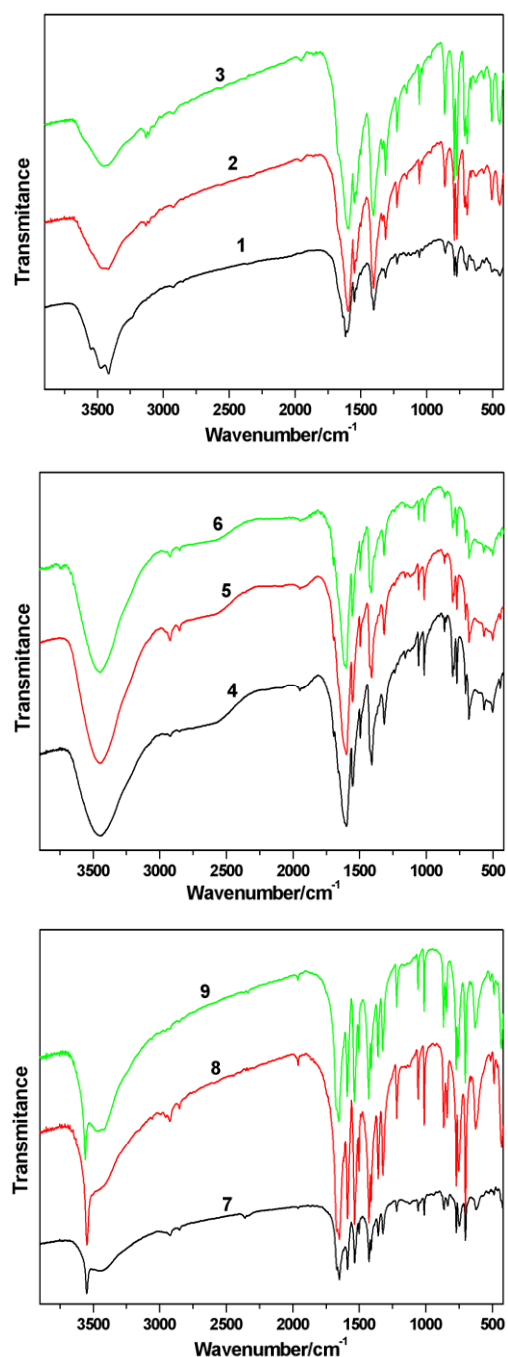

Figure S1. The IR spectra of 1-9, respectively.

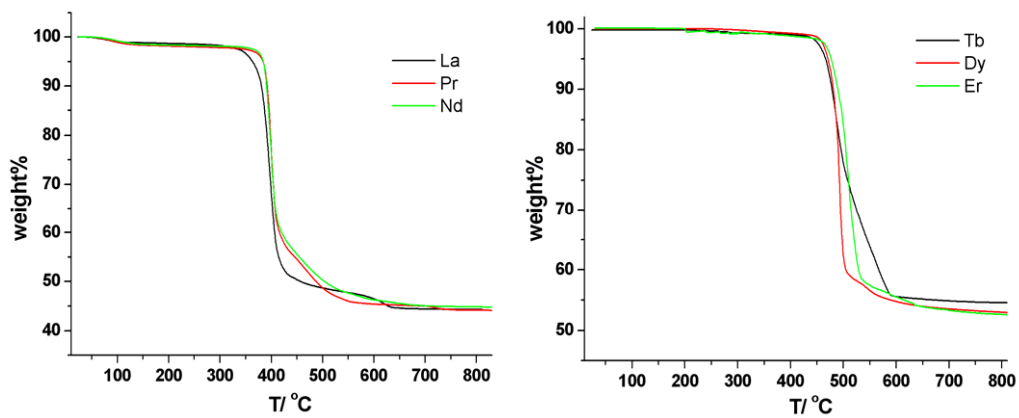

**Figure S2.** TG curves of porous type I (La, Pr, Nd) and type III (Tb, Dy, Er) compounds.
